# Supplementary material
Source: ML conference proceedings conference paper supplement (https://openaccess.thecvf.com/content/CVPR2023/html/Sung-Bin_Sound_to_Visual_CVPR_2023_paper.html)
Supplement: Supplementary file 3 [file Sung-Bin_Sound_to_Visual_CVPR_2023_supplemental.zip]

Archive with 4 entries (4 files):
- cam_ready_final.mp4
- __MACOSX/._cam_ready_final.mp4
- cam_ready_final.pdf
- __MACOSX/._cam_ready_final.pdf
